# Supplementary material
Source: PubMed Central journal article supplement (PMC7959574)
Supplement: pnas.2009609117.sapp.pdf [file pnas.2009609117.sapp.pdf]

# PNAS

[www.pnas.org](http://www.pnas.org)

**Supplementary Information for**

Economic Hardship and Mental Health Complaints during COVID-19.

**Authors**

Dirk Witteveen <sup>1</sup>

Eva Velthorst <sup>2,3</sup>

<sup>1</sup> Nuffield College, University of Oxford

<sup>2</sup> Department of Psychiatry, Icahn School of Medicine at Mount Sinai, New York, US

<sup>3</sup> Seaver Autism Center for Research and Treatment, Icahn School of Medicine at Mount Sinai, New York, US

**This PDF file includes:**

Figures S1 to S7.

**Fig S1.** Descriptive Statistics: ISEI and Mental Health Complaints by Economic Hardship during COVID-19.

|                 | <b>Occupational<br/>prestige<br/>(ISEI mean)</b> | <b>Mental Health Complaint</b>     |                                    |                                        |
|-----------------|--------------------------------------------------|------------------------------------|------------------------------------|----------------------------------------|
|                 |                                                  | <b>Depression<br/>(proportion)</b> | <b>Loneliness<br/>(proportion)</b> | <b>Health anxiety<br/>(proportion)</b> |
| <b>Workload</b> |                                                  |                                    |                                    |                                        |
| no change       | 57.2                                             | .203                               | .293                               | .280                                   |
| decreased       | 48.6                                             | .248                               | .284                               | .406                                   |
| increased       | 54.7                                             | .298                               | .273                               | .440                                   |
| <b>Income</b>   |                                                  |                                    |                                    |                                        |
| stable          | 56.4                                             | .214                               | .255                               | .310                                   |
| losing          | 47.7                                             | .336                               | .300                               | .439                                   |
| <b>Job</b>      |                                                  |                                    |                                    |                                        |
| keeping         | 55.2                                             | .227                               | .259                               | .346                                   |
| losing          | 44.5                                             | .403                               | .371                               | .452                                   |
| <b>Sample</b>   | 53.1                                             | .262                               | .265                               | .372                                   |

*Notes.* ISEI = mean international socio-economic index of occupational status (range 10-89), where higher index numbers reflect higher-ranked prestige jobs. Study sample: active members of the labor force in Europe between ages 25 and 64 from Czech Republic, Slovakia, Spain, Italy, Germany, and Netherlands. European countries excluded because of a low number (<100) of survey respondents between March and the end of April (2020): Hungary (79 respondents), Portugal (65), Belgium (62), Ireland (43), United Kingdom (34), Austria (18), Switzerland (12), Ukraine (11), Poland (4), Greece (4), Sweden (3), Belarus (3), Serbia (3), Bulgaria (1), and Romania (1).

**Fig S2.** Estimated Margins of Control Variables on Economic Hardship Outcomes during COVID-19.

|                              | <b>Workload</b><br>(ref = stable) |                   | <b>Income loss</b> | <b>Job loss</b>    |
|------------------------------|-----------------------------------|-------------------|--------------------|--------------------|
|                              | decreased                         | increased         | (yes = 1)          | (yes = 1)          |
| Age                          | .003<br>(.01)                     | .008<br>(.01)     | .010<br>(.01)      | .013<br>(.01)      |
| Gender: woman <sup>1</sup>   | -.008<br>(.03)                    | .067*<br>(.03)    | .019<br>(.03)      | .008<br>(.02)      |
| Foreign-born <sup>2</sup>    | .032<br>(.06)                     | -.075<br>(.06)    | .071<br>(.05)      | .063*<br>(.03)     |
| Employment type <sup>3</sup> |                                   |                   |                    |                    |
| freelance / self-employed    | .322***<br>(.07)                  | -.226***<br>(.05) | .420***<br>(.07)   | .195**<br>(.07)    |
| employer                     | .272*<br>(.12)                    | -.196*<br>(.09)   | .557***<br>(.11)   | .249<br>(.14)      |
| other                        | .281<br>(.13)                     | -.203<br>(.09)    | .234<br>(.15)      | .093<br>(.10)      |
| Firm size <sup>4</sup>       |                                   |                   |                    |                    |
| small (<50 empl.)            | .032<br>(.04)                     | -.040<br>(.04)    | -.079*<br>(.04)    | .011<br>(.03)      |
| medium (50-500 empl.)        | -.015<br>(.04)                    | .013<br>(.04)     | -.008<br>(.04)     | -.048*<br>(.02)    |
| Urbanicity <sup>5</sup>      |                                   |                   |                    |                    |
| small city / town            | .047<br>(.03)                     | .002<br>(.03)     | .009<br>(.03)      | .002<br>(.02)      |
| village / rural              | -.078<br>(.05)                    | .120*<br>(.05)    | -.063<br>(.05)     | -.011<br>(.03)     |
| Survey week #                | -.010<br>(.01)                    | .005<br>(.01)     | -.022~<br>(.01)    | .007<br>(.01)      |
| ISEI (per 10pts)             | -.065***<br>(.008)                | .021***<br>(.009) | .068***<br>(.010)  | -.028***<br>(.008) |

*Notes.* Marginal effects are drawn from multinomial logit (workload) and logit (income loss, job loss) with country-random intercepts. Estimates are equal to %-point change of a one unit change in the predictor variable on the propensity of decreased workload (2 vs. 1), increased workload (3 vs. 1), losing income (1 vs. 0), and losing job (1 vs. 0). Reference categories: <sup>1</sup> man, <sup>2</sup> native-born, <sup>3</sup> employee, <sup>4</sup> large firm (>500 employees), and <sup>5</sup> large city. ISEI = international socio-economic index of occupational status (range 10-89). The age predictor is adjusted with a suppressed non-linearity term (age squared). Standard errors between parentheses. ~ p <.1; \* p <.05; \*\* p <.01; \*\*\* p <.001 (two-tailed tests).

**Fig S3.** Margins of Key Predictors (Reported) and Alternative Selections and Specifications.

| Outcome            | Key predictor     | Reported | Incl. 'blank' as 0 (no) | Incl. 18-24-year olds | Post-strat. weights | Estimates when excluding: |          |          |          |          |             |
|--------------------|-------------------|----------|-------------------------|-----------------------|---------------------|---------------------------|----------|----------|----------|----------|-------------|
|                    |                   |          |                         |                       |                     | Czech Republic            | Slovakia | Spain    | Italy    | Germany  | Netherlands |
| workload decrease  | ISEI (per 10pts)  | -.065*** | -.063***                | -.066***              | -.064***            | -.063***                  | -.073*** | -.056*** | -.060*** | -.066*** | -.068***    |
| workload increase  | ISEI (per 10pts)  | .021     | .021                    | .019                  | .017                | .017                      | .018~    | .027     | .019     | .025     | .019        |
| losing income      | ISEI (per 10pts)  | -.068*** | -.055***                | -.069***              | -.080***            | -.067***                  | -.074*** | -.066*** | -.060*** | -.064*** | -.081***    |
| losing job         | ISEI (per 10pts)  | -.028*** | -.020***                | -.036***              | -.044***            | -.025***                  | -.025*** | -.029*** | -.036*** | -.027*** | -.028***    |
| depression feeling | ISEI (per 10pts)  | -.033*** | n.a.                    | -.031***              | -.038***            | -.030**                   | -.038*** | -.022*   | -.032**  | -.035*** | -.036***    |
| loneliness feeling | ISEI (per 10pts)  | -.015    | n.a.                    | -.012                 | -.020**             | -.014                     | -.021*   | -.003    | -.014    | -.018*   | -.015       |
| health anxiety     | ISEI (per 10pts)  | -.029**  | n.a.                    | -.024**               | -.036**             | -.025*                    | -.035**  | -.020*   | -.029**  | -.028**  | -.036***    |
| depression feeling | workload decrease | .086**   | .085**                  | .080*                 | .108**              | .072*                     | .077*    | .093*    | .091**   | .087*    | .103**      |
| depression feeling | workload increase | .099**   | .099**                  | .096**                | .127**              | .095*                     | .080*    | .052*    | .109**   | .123**   | .124**      |
| depression feeling | losing income     | .111**   | .095**                  | .117***               | .103~               | .102**                    | .095**   | .144**   | .108**   | .105**   | .113**      |
| depression feeling | losing job        | .145**   | .133**                  | .129**                | .145                | .124*                     | .108*    | .202**   | .143**   | .141**   | .159**      |
| loneliness feeling | workload decrease | .054     | .055                    | .061~                 | .081*               | .065~                     | .072~    | .048     | .052     | .047     | .037        |
| loneliness feeling | workload increase | .045     | .048                    | .041                  | .056*               | .041                      | .037     | -.005    | .045     | .056     | .060        |
| health anxiety     | workload decrease | .111**   | .109**                  | .081*                 | .148*               | .108**                    | .116**   | .091*    | .107**   | .106**   | .130**      |
| health anxiety     | workload increase | .149***  | .147**                  | .133***               | .178***             | .132**                    | .184***  | .122*    | .159***  | .141**   | .172***     |

*Notes.* Marginal effects are drawn from multinomial logit and logit with country-random intercepts. Estimates are equal to %-point change of a one-unit change in the predictor variable. The table summarizes all theorized relationships between predictors and outcomes (main effects). Key predictor estimates are reported in the main text (Figures 2 thru 4), with exception of ISEI's association with loneliness and workload change (not significant). ISEI = international socio-economic index of occupational status. Column for including 'blank' as 0 (or 'no') replicates analyses whereby unanswered questions for workload change, income loss, and job loss were to be interpreted as 'stable workload,' 'stable income,' and 'keeping job' (see Fig S2). The workload change variable is nominal with 'no change' as the reference category. Reference categories of dichotomous outcomes 'losing income' and 'losing job' are 'stable income' and 'keeping job,' respectively. ~ p <.1; \* p <.05; \*\* p <.01; \*\*\* p <.001 (two-tailed tests).

**Fig S4.** Estimated Margins of Control Variables on Mental Health Complaints during COVID-19.

|                              | Depression         |                   | Loneliness       |                  | Health anxiety    |                  |
|------------------------------|--------------------|-------------------|------------------|------------------|-------------------|------------------|
|                              | main               | adjusted          | main             | adjusted         | main              | adjusted         |
| Age                          | .022~<br>(.01)     | .010<br>(.01)     | .014<br>(.01)    | .010<br>(.01)    | .025~<br>(.01)    | .023~<br>(.01)   |
| Gender: woman <sup>1</sup>   | .065*<br>(.03)     | .016<br>(.03)     | .070*<br>(.03)   | .041<br>(.03)    | .073*<br>(.03)    | .049<br>(.03)    |
| Foreign-born <sup>2</sup>    | .017<br>(.05)      | -.015<br>(.05)    | -.018<br>(.05)   | -.040<br>(.05)   | .063<br>(.06)     | .052<br>(.06)    |
| Partner: no <sup>3</sup>     | .035<br>(.03)      | .031<br>(.03)     | .157***<br>(.03) | .156***<br>(.03) | -.028<br>(.03)    | -.027<br>(.03)   |
| Employment type <sup>4</sup> |                    |                   |                  |                  |                   |                  |
| freelance / self-employed    | .126~<br>(.07)     | .119~<br>(.06)    | .032<br>(.07)    | .018<br>(.07)    | .042<br>(.07)     | .029<br>(.07)    |
| Employer                     | .230*<br>(.12)     | .221*<br>(.11)    | .078<br>(.11)    | .065<br>(.11)    | -.016<br>(.11)    | -.030<br>(.11)   |
| Other                        | .331*<br>(.16)     | .296~<br>(.15)    | .202<br>(.15)    | .168<br>(.15)    | .017<br>(.14)     | -.020<br>(.13)   |
| Firm size <sup>5</sup>       |                    |                   |                  |                  |                   |                  |
| small (<50 empl.)            | .013<br>(.04)      | 0.12<br>(.03)     | -.019<br>(.04)   | -.022<br>(.04)   | .017<br>(.04)     | .016<br>(.04)    |
| medium (50-500 empl.)        | .041<br>(.04)      | .057~<br>(.03)    | .022<br>(.04)    | .029<br>(.04)    | .021<br>(.04)     | .029<br>(.04)    |
| Urbanicity <sup>6</sup>      |                    |                   |                  |                  |                   |                  |
| small city / town            | .023<br>(.03)      | .041<br>(.03)     | .019<br>(.03)    | .023<br>(.03)    | -.081*<br>(.03)   | -.073*<br>(.03)  |
| village / rural              | -.023<br>(.05)     | -.008<br>(.04)    | -.071<br>(.04)   | -.070<br>(.04)   | -.008<br>(.05)    | -.007<br>(.05)   |
| Survey week #                | .018~<br>(.01)     | .019*<br>(.01)    | .018~<br>(.01)   | .016<br>(.01)    | -.008<br>(.01)    | -.012<br>(.01)   |
| Ever depressed / anxiety     | -                  | .410***<br>(.03)  | -                | .206***<br>(.04) | -                 | .226***<br>(.04) |
| ISEI (per 10pts)             | -.033***<br>(.008) | -.020**<br>(.007) | -.015<br>(.009)  | -.010<br>(.009)  | -.029**<br>(.009) | -.022*<br>(.009) |

*Notes.* ‘Adjusted’ column adds history of self-reported feelings of depression or health anxiety to the model (attenuating the occupational prestige [ISEI] associations). Marginal effects are drawn from multinomial logit (workload) and logit (income loss, job loss) with country-random intercepts. Estimates are equal to %-point change of a one-unit change in the predictor variable on the propensity of decreased workload (2 vs. 1), increased workload (3 vs. 1), losing income (1 vs. 0), and losing job (1 vs. 0). Reference categories: <sup>1</sup> man, <sup>2</sup> native-born, <sup>3</sup> partner in household, <sup>4</sup> employee, <sup>5</sup> large firm (>500 employees), <sup>6</sup> large city. ISEI = international socio-economic index of occupational status (range 10-89). The age predictor is adjusted with a suppressed non-linearity term (age squared). Standard errors between parentheses. ~ p <.1; \* p <.05; \*\* p <.01; \*\*\* p <.001 (two-tailed tests).

**Fig S5.** Margins of Key Predictors (Reported) and Alternative Selections: Sub-Industries.

| Outcome            | Key predictor     | Reported | Estimating when excluding:               |                            |                   |                              |                 |
|--------------------|-------------------|----------|------------------------------------------|----------------------------|-------------------|------------------------------|-----------------|
|                    |                   |          | (a)<br>buildings/<br>public<br>transport | (b)<br>customer<br>service | (c)<br>healthcare | (d)<br>cleaners /<br>helpers | (a)<br>thru (d) |
| workload decrease  | ISEI (per 10pts)  | -.065*** | -.065***                                 | -.062***                   | -.068***          | -.062***                     | -.062***        |
| workload increase  | ISEI (per 10pts)  | .021     | .020                                     | .018                       | .021              | .019                         | .016            |
| losing income      | ISEI (per 10pts)  | -.068*** | -.067***                                 | -.065***                   | -.073***          | -.066***                     | -.066***        |
| losing job         | ISEI (per 10pts)  | -.028*** | -.029***                                 | -.027***                   | -.028***          | -.029***                     | -.028***        |
| depression feeling | ISEI (per 10pts)  | -.033*** | -.032***                                 | -.035***                   | -.032***          | -.031***                     | -.032***        |
| loneliness feeling | ISEI (per 10pts)  | -.015    | -.015                                    | -.015                      | -.016             | -.012                        | -.015           |
| health anxiety     | ISEI (per 10pts)  | -.029**  | -.030**                                  | -.030**                    | -.031**           | -.028**                      | -.032**         |
| depression feeling | workload decrease | .086**   | .080*                                    | .084*                      | .089**            | .086*                        | .080*           |
| depression feeling | workload increase | .099**   | .099**                                   | .097**                     | .100**            | .100**                       | .099**          |
| depression feeling | losing income     | .111**   | .109**                                   | .115**                     | .113**            | .107**                       | .112**          |
| depression feeling | losing job        | .145**   | .148**                                   | .145**                     | .145**            | .140**                       | .141**          |
| loneliness feeling | workload decrease | .054     | .052                                     | .052                       | .052              | .050                         | .046            |
| loneliness feeling | workload increase | .045     | .042                                     | .042                       | .044              | .041                         | .047            |
| health anxiety     | workload decrease | .111**   | .113**                                   | .111**                     | .109**            | .107**                       | .106**          |
| health anxiety     | workload increase | .149***  | .149***                                  | .149***                    | .144***           | .149***                      | .145***         |

*Notes.* Marginal effects are drawn from multinomial logit and logit with country-random intercepts. Estimates are equal to %-point change of a one-unit change in the predictor variable. The table summarizes all theorized relationships between predictors and outcomes (main effects). Key predictor estimates are reported in the main text (Figures 2 thru 4), with exception of ISEI's association with loneliness workload change (not significant). ISEI = international socio-economic index of occupational status. Sub-industries based on 3- and 4-digit the International Standard Classification of Occupations (ISCO) codes: (a) building supervisors, conductors, bus and tram drivers, (b) tellers, client information workers, (c) medical doctors and nursing, and (d) domestic/hotel cleaners/helpers and laundry cleaners. The workload change variable is nominal with 'no change' as the reference category. Reference categories of dichotomous outcomes 'losing income' and 'losing job' are 'stable income' and 'keeping job,' respectively. \* p <.05; \*\* p <.01; \*\*\* p <.001 (two-tailed tests).

**Fig S6.** Coding of Outcome, Predictor, and Control Variables from WageIndicator Dataset.

| Variable                     | Category           | Survey question(s)                                                                                                                                 | Coding                                                              |
|------------------------------|--------------------|----------------------------------------------------------------------------------------------------------------------------------------------------|---------------------------------------------------------------------|
| Workload                     | outcome, predictor | How is your job affected? Has increased / Has decreased (exclusive categories), Neither (by default)                                               | Stable (1), decreased (2), increased (3)                            |
| Income loss                  | outcome, predictor | How is your job affected? I (will) receive less income (0/1)                                                                                       | Stable income (0), less income (1)                                  |
| Job loss                     | outcome, predictor | How is your job affected? I (will) lose my job (0/1)                                                                                               | Keeping job (0), losing job (1)                                     |
| Depression feeling           | outcome            | Because of the coronavirus: I feel mentally depressed, rating 1 (28%), 2 (20%), 3 (22%), 4 (23%), 5 (7%)                                           | Not depressed (0), depressed (1) if rating 4 or 5                   |
| Loneliness feeling           | outcome            | Because of the coronavirus: I feel lonely, rating 1 (23%), 2 (27%), 3 (23%), 4 (20%), 5 (7%)                                                       | Not depressed (0), depressed (1) if rating 4 or 5                   |
| Health anxiety               | outcome            | Because of the coronavirus: I feel afraid that I get sick, rating 1 (15%), 2 (27%), 3 (22%), 4 (27%), 5 (9%)                                       | No fear (0), fear (1) if rating 4 or 5                              |
| Occupational prestige (ISEI) | predictor          | What is your occupation? Coded to International Standard Classification of Occupations (ISCO)                                                      | ISCO converted to ISEI by WageIndicator (continuous: range 10-89)   |
| Age                          | control            | When were you born? Date:                                                                                                                          | Age (continuous), coded by WageIndicator                            |
| Age squared                  | control            | When were you born? Date:                                                                                                                          | Age (continuous), coded by WageIndicator                            |
| Gender                       | control            | What is your gender?                                                                                                                               | Man (0), woman (1)                                                  |
| Survey week / timing         | control            | Week of survey                                                                                                                                     | 13 thru 18 (continuous)                                             |
| Migration background         | control            | Constructed based on: In which country do you live? + In which country were you born?                                                              | Born in country of residence (0), foreign-born (1)                  |
| Partner (in household)       | control            | With whom do you live in your household? Spouse / partner                                                                                          | No partner (0), partner (1)                                         |
| Children (in household)      | control            | With whom do you live in your household? One or more children                                                                                      | No children (0), children (1)                                       |
| Employment status            | control            | What is your employment status? Employee / Self-empl, no employees, freelance / Self-employed, employees / Family worker / Casual / Other          | Employee (1), freelance/casual (2), employer (3), other (4)         |
| Firm size                    | control            | How many people are employed at your place of work? Alone, 2-4, 5-9, 10-20, 20-50, 50-100, 100-200, 200-500, 500-1000, 1000-2000, 2000-5000, 5000+ | Self-employed (1), -2-50 (2), 50-500 (3), 500+ (4)                  |
| Urbanity                     | control            | You live in the region of... (country-specific) Metropole, large city, medium-sized city, small city, town, village, rural                         | city or metropole (1), small city or town (2), village or rural (3) |
| Ever depressed / anxious     | control            | Have you recovered from the disease? Depression or anxiety                                                                                         | Never depressed / anxious (0), ever depressed / anxious (1)         |

*Notes.* Updated with survey data through April-30, 2020 (downloaded May-1, 2020). After selections (active labor force, ages 25 thru 64 in selected countries) the study sample consists of 1,012 cases. Cases were listwise-deleted from the analysis if data were missing on the outcome variable and (key) predictor variable(s). Within these selections 2 cases miss an ISEI score and no control variables have additional missingness with exception of valid missing (i.e. recently furloughed). Valid missingness was only observed when predicting job loss, whereby employment status had been updated to ‘not working’ if the job was already lost. Hence, models predicting job loss exclude employment status. Regarding economic hardship outcome variables, 16 cases had missing data on workload change, 2 cases had missing data on income loss, and 2 cases had missing data on job loss (no additional missingness among control variables). Furthermore, 29 cases (workload change), 156 cases (income loss), and 254 (job loss) had blank answers to key questions about economic hardships. Robustness checks indicated that interpreting these blank answers as “don’t know” and classifying them as no change (1) or no income/job loss (0) does not lead to different results (see Supplement 3).

### **Data access**

An overview of the surveys in the participating countries is available on <https://wageindicator.org/salary/living-and-working-in-times-of-the-coronavirus>. Description of the data project: <https://wageindicator.org/Wageindicatorfoundation/projects/living-and-workingin-coronavirus-times>. Data are accessible for academic researchers after registration with IZA – Institute of Labor Economics.



**Fig S7.** Correlation Matrix Including All Outcome and Predictor Variables Theorized and Considered.

|              | DEP    | LON    | FEAR   | WORKL  | INCL   | JOBL   | ISEI   | AGE    | AGES  | GEND  | WEEK   | FOR   | PART  | CHLD  | EMPL  | FIRMS | URB   | EVERD |  |
|--------------|--------|--------|--------|--------|--------|--------|--------|--------|-------|-------|--------|-------|-------|-------|-------|-------|-------|-------|--|
| <b>DEP</b>   | 1.000  |        |        |        |        |        |        |        |       |       |        |       |       |       |       |       |       |       |  |
| <b>LON</b>   | .349*  | 1.000  |        |        |        |        |        |        |       |       |        |       |       |       |       |       |       |       |  |
| <b>FEAR</b>  | .173*  | .070*  | 1.000  |        |        |        |        |        |       |       |        |       |       |       |       |       |       |       |  |
| <b>WORKL</b> | .088*  | .023   | .133*  | 1.000  |        |        |        |        |       |       |        |       |       |       |       |       |       |       |  |
| <b>INCL</b>  | .133*  | .049   | .128*  | .048   | 1.000  |        |        |        |       |       |        |       |       |       |       |       |       |       |  |
| <b>JOBL</b>  | .115*  | .071   | .062   | .020   | .413*  | 1.000  |        |        |       |       |        |       |       |       |       |       |       |       |  |
| <b>ISEI</b>  | -.101* | -.009  | -.130* | -.070* | -.249* | -.184* | 1.000  |        |       |       |        |       |       |       |       |       |       |       |  |
| <b>AGE</b>   | -.100* | -.221* | .112*  | .074*  | -.003  | -.040  | -.169* | 1.000  |       |       |        |       |       |       |       |       |       |       |  |
| <b>AGES</b>  | -.102* | -.220* | .101*  | .070*  | -.013  | -.047  | -.163* | .993*  | 1.000 |       |        |       |       |       |       |       |       |       |  |
| <b>GEND</b>  | .073*  | .074*  | .055   | .085*  | -.034  | .004   | -.042  | .026   | .030  | 1.000 |        |       |       |       |       |       |       |       |  |
| <b>WEEK</b>  | .046   | .041   | -.026  | .027   | -.115* | -.008  | -.046  | .145*  | .157* | .191* | 1.000  |       |       |       |       |       |       |       |  |
| <b>FOR</b>   | .009   | -.002  | .022   | -.051  | .043   | .113*  | .071*  | -.040  | -.034 | .018  | .049   | 1.000 |       |       |       |       |       |       |  |
| <b>PART</b>  | -.045  | -.191* | .052   | .047   | .014   | .032   | -.050  | .118*  | .108* | -.026 | -.017  | -.016 | 1.000 |       |       |       |       |       |  |
| <b>CHLD</b>  | .004   | -.148* | .023   | .021   | .015   | .089*  | -.096* | .186*  | .151* | -.002 | -.011  | -.046 | .555* | 1.000 |       |       |       |       |  |
| <b>EMPL</b>  | .040   | .025   | -.016  | -.035  | .183*  | .164*  | .003   | -.066* | -.058 | -.005 | -.096* | .064* | .005  | -.051 | 1.000 |       |       |       |  |
| <b>FIRMS</b> | -.035  | .009   | -.015  | .016   | -.051  | .029   | -.049  | -.054  | -.047 | .050  | -.041  | .012  | .010  | -.025 | .503* | 1.000 |       |       |  |
| <b>URB</b>   | .013   | -.018  | -.045  | .069*  | -.017  | .003   | -.084* | .010   | .014  | .074* | .003   | -.062 | -.011 | -.018 | .053  | .026  | 1.000 |       |  |
| <b>EVERD</b> | .402*  | .216*  | .197*  | .028   | .152*  | .122*  | -.108* | -.051  | -.057 | .059  | .006   | .044  | .308* | .363* | .028  | -.015 | -.023 | 1.000 |  |

*Notes.* DEP = complaint: depressed, LON = complaint: lonely, FEAR = health anxiety, WORKL = workload change, INCL = income loss, JOBL = job loss, ISEI = international socio-economic index of occupations, AGE = age, AGES = age squared, GEND = gender, WEEK = survey week number, FOR = foreign-born (country of birth), PART = partner (in household), CHLD = children (in household), EMPL (employment status), FIRMS (firm size), URB (urbanicity), EVERD = ever depressed or anxious. See Supplement 6 for variable coding. \* denotes significant correlation with  $\alpha = .05$ .
